# Supplementary material
Source: PubMed Central journal article supplement (PMC4133291)
Supplement: NIHMS605346-supplement-supp.pdf [file NIHMS605346-supplement-supp.pdf]

# Supplementary Material

## SUPPLEMENTARY METHODS

Data used in the preparation of this article were obtained from the ADNI database (<http://adni.loni.usc.edu>). The ADNI was launched in 2003 by the National Institute on Aging (NIA), the National Institute of Biomedical Imaging and Bioengineering (NIBIB), the Food and Drug Administration (FDA), private pharmaceutical companies and non-profit organizations, as a \$60 million, 5-year public-private partnership. The primary goal of ADNI has been to test whether serial magnetic resonance imaging (MRI), positron emission tomography (PET), other biological markers, and clinical and neuropsychological assessment can be combined to measure the progression of MCI and early AD. Determination of sensitive and specific markers of very early AD progression is intended to aid researchers and clinicians to develop new treatments and monitor their effectiveness, as well as lessen the time and cost of clinical trials. The Principal Investigator of this initiative is Michael W. Weiner, MD, VA Medical Center and University of California – San Francisco. ADNI is the result of efforts of many co-investigators from a broad range of academic institutions and private corporations, and subjects have been recruited from over 50 sites across the U.S. and Canada. The initial goal of ADNI was to recruit 800 subjects but ADNI has been followed by ADNI-GO and ADNI-2. To date these three protocols have recruited over 1500 adults, ages 55 to 90, to participate in the research, consisting of cognitively normal older individuals, people with early or late MCI, and people with early AD. The follow up duration of each group is specified in the protocols for ADNI-1, ADNI-2 and ADNI-GO. Subjects originally recruited for ADNI-1 and ADNI-GO had the option to be followed in ADNI-2. For up-to-date information, see <http://www.adni-info.org>.

## **Standard Protocol Approvals, Registrations, and Patient Consents**

This study was approved by an ethical standards committee on human experimentation at each institution. Written informed consent was obtained from all participants or authorized representatives participating in the study.

## **Apolipoprotein E Genotypes**

Apolipoprotein E genotyping was performed at the time of participant enrollment and included in the ADNI database. The two single nucleotide polymorphisms (rs429358, rs7412) that define the epsilon 2, 3, and 4 alleles, are not on the Human610-Quad BeadChip, and therefore were genotyped using DNA extracted via blood by Cogenics from a 3 mL aliquot of ethylenediaminetetraacetic acid-containing vacutainer tubes. Polymerase chain reaction amplification was followed by HhaI restriction enzyme digestion, resolution on 4% Metaphor Gel, and visualization by ethidium bromide staining. See <http://www.adni-info.org> for details.

## **Cerebrospinal Fluid Measures**

Methods of CSF acquisition and biomarker measurement using the ADNI sample have previously been described by Shaw et al. [1]. Briefly, CSF was collected and stored at -80°C at the University of Pennsylvania ADNI Biomarker Core Laboratory. Amyloid- $\beta$  from peptides 1-42, tau phosphorylated at threonine 181, and total tau was measured using the multiplex xMAP Luminex platform (Luminex Corp, Austin, TX) with Innogenetics (INNOBIA AlzBio3, Ghent, Belgium) immunoassay kit-based reagents. See <http://www.adni-info.org> for details.

## **SUPPLEMENTARY RESULTS**

### **Performances of MCI Subtypes on ADNI's Diagnostic Measures**

#### *Conventional criteria*

On the WMS-R Logical Memory II subtest, which was used in ADNI's MCI diagnosis and thus not included in the cluster analysis, the *Amnestic* and *Dysexecutive/Mixed* groups performed similarly to each other ( $p > 0.05$ ) but worse than the *Cluster-Derived Normal* group ( $ps < 0.001$ ). A similar pattern was found on the MMSE, as the two impaired groups performed worse than the *Cluster-Derived Normal* group ( $ps < 0.001$ ). Global CDR scores were 0.5 for all cluster groups; however, *Amnestic* and *Dysexecutive/Mixed* groups scored higher on the CDR Sum of Boxes compared to the *Cluster-Derived Normal* group ( $ps < 0.001$ ).

#### *Actuarial criteria*

On the WMS-R Logical Memory II subtest, the *Amnestic* and *Dysexecutive/Mixed* and groups performed worse than the *Impaired Language* group ( $ps < 0.01$ ). On the MMSE, the *Dysexecutive/Mixed* group performed worse than the other two groups ( $ps < 0.01$ ). There was no difference between groups on CDR Sum of Boxes scores ( $p > 0.05$ ).

### **Clinical and Biomarker Characteristics of Cluster-Derived Normal Participants Who Progressed to AD**

Among the *Cluster-Derived Normal* subgroup it is notable that as a whole they demonstrated a higher APOE  $\epsilon 4$  allelic frequency (38%) than the overall sample of ADNI cognitively normal participants ( $n=407$  with genetic data available,  $\epsilon 4$  carriers = 27%;  $\chi^2(1) = 8.76$ ;  $p=0.003$ ), suggesting that this group nevertheless contained at least a subset of at-risk individuals that

might still be differentiable by other clinical, imaging, and biomarker characteristics. Follow-up analyses showed that 23 of the 246 (9.3%) of the participants in this *Cluster-Derived Normal* group did in fact progress to AD within our follow-up timeframe. Also, 11 of the 23 (48%) who progressed carried the APOE-  $\epsilon$ 4 allele, a rate similar to the other empirically-derived MCI subtypes (e.g., *Amnesic, Dysexecutive/Mixed, Impaired Language*). Moreover, those 23 participants who ultimately progressed to AD were significantly older ( $t(244) = -2.69, p < 0.01$ ) than their 223 counterparts with follow-up data who did not progress, and they showed statistically significant poorer memory recall (AVLT Recall:  $t(244) = 3.56, p < 0.001$ ) as well as qualitatively lower neuropsychological scores across the other tests administered. CSF biomarkers also differed, as those who progressed demonstrated lower  $A\beta_{1-42}$  ( $t(138) = 3.00, p = 0.003$ ) and slightly higher p-tau<sub>181p</sub>/ $A\beta_{1-42}$  values ( $t(10.4) = -2.40, p = 0.04$ ) when compared to those who did not progress to AD. The mean time point at which a dementia diagnosis was made for these 23 individuals was 34.2 months post-screening, or about 12-15 months later than for either of the other progression rates based on the conventional or actuarial criteria.

Overall, the statistical classification of MCI based on neuropsychological test scores resulted in a significant improvement in the specificity of the diagnosis, as it identified 265 participants with potentially false positive diagnoses. However, it was at a cost of some modest corresponding decline in sensitivity, as a subset of 23 individuals in the *Cluster-Derived Normal* group did progress to dementia over time. Thus their original ADNI diagnosis of MCI could be considered accurate. However, it is important to note that nearly an equal number of individuals (21 participants; 8.5%) in the *Cluster-Derived Normal* group reverted a cognitively normal classification by ADNI at follow-up, suggesting roughly equal diagnostic errors in the opposite direction. All told, our findings suggest that a very modest loss in sensitivity (i.e., 23 of the 246

participants with follow-up data) is far outweighed by the large gains in specificity (i.e., 223 of the 246 participants).

## **Reference**

- [1] Shaw LM, Vanderstichele H, Knapik-Czajka M, Clark CM, Aisen PS, Petersen RC, Blennow K, Soares H, Simon A, Lewczuk P, Dean R, Siemers E, Potter W, Lee VM, Trojanowski JQ; Alzheimer's Disease Neuroimaging Initiative (2009) Cerebrospinal fluid biomarker signature in Alzheimer's disease neuroimaging initiative subjects. *Ann Neurol* **65**, 403-413.

**Supplementary Table 1.** ADNI roster ID numbers of participants in this study.

|    |     |     |     |     |     |     |     |     |      |
|----|-----|-----|-----|-----|-----|-----|-----|-----|------|
| 5  | 96  | 195 | 301 | 408 | 502 | 601 | 695 | 825 | 915  |
| 6  | 97  | 196 | 303 | 409 | 505 | 602 | 697 | 830 | 917  |
| 8  | 98  | 200 | 307 | 410 | 507 | 604 | 698 | 832 | 919  |
| 14 | 101 | 204 | 312 | 413 | 511 | 607 | 702 | 834 | 920  |
| 16 | 102 | 205 | 314 | 414 | 513 | 608 | 708 | 835 | 921  |
| 19 | 103 | 214 | 315 | 416 | 514 | 610 | 709 | 839 | 922  |
| 21 | 107 | 217 | 319 | 417 | 516 | 611 | 711 | 842 | 923  |
| 23 | 108 | 222 | 324 | 419 | 518 | 613 | 715 | 845 | 924  |
| 30 | 111 | 225 | 325 | 422 | 519 | 618 | 718 | 851 | 925  |
| 31 | 112 | 227 | 326 | 423 | 520 | 621 | 721 | 855 | 926  |
| 38 | 116 | 229 | 327 | 424 | 522 | 625 | 722 | 856 | 928  |
| 40 | 120 | 230 | 331 | 425 | 525 | 626 | 723 | 860 | 930  |
| 41 | 125 | 231 | 336 | 429 | 526 | 629 | 725 | 861 | 931  |
| 42 | 126 | 240 | 337 | 433 | 531 | 631 | 726 | 862 | 932  |
| 43 | 128 | 241 | 339 | 434 | 533 | 634 | 727 | 863 | 934  |
| 44 | 130 | 243 | 344 | 441 | 534 | 637 | 729 | 865 | 941  |
| 45 | 135 | 249 | 351 | 442 | 538 | 638 | 731 | 866 | 945  |
| 47 | 138 | 256 | 352 | 443 | 539 | 641 | 734 | 867 | 947  |
| 48 | 141 | 257 | 354 | 445 | 544 | 643 | 741 | 869 | 950  |
| 50 | 142 | 258 | 359 | 446 | 545 | 644 | 746 | 871 | 951  |
| 51 | 150 | 262 | 361 | 448 | 546 | 647 | 748 | 872 | 952  |
| 54 | 155 | 269 | 362 | 449 | 549 | 648 | 750 | 873 | 954  |
| 57 | 158 | 272 | 363 | 450 | 551 | 649 | 751 | 874 | 957  |
| 58 | 159 | 273 | 369 | 458 | 552 | 656 | 752 | 878 | 958  |
| 60 | 160 | 276 | 376 | 461 | 553 | 657 | 767 | 880 | 961  |
| 66 | 161 | 282 | 377 | 464 | 557 | 658 | 768 | 886 | 963  |
| 67 | 168 | 283 | 378 | 469 | 559 | 667 | 769 | 887 | 967  |
| 68 | 169 | 284 | 382 | 472 | 563 | 668 | 770 | 890 | 969  |
| 70 | 172 | 285 | 384 | 473 | 566 | 669 | 771 | 892 | 973  |
| 72 | 173 | 288 | 386 | 476 | 567 | 671 | 782 | 896 | 976  |
| 74 | 176 | 289 | 388 | 478 | 568 | 672 | 783 | 898 | 978  |
| 77 | 177 | 290 | 389 | 479 | 572 | 673 | 792 | 904 | 981  |
| 80 | 178 | 291 | 390 | 481 | 575 | 675 | 800 | 906 | 982  |
| 81 | 179 | 292 | 393 | 485 | 576 | 677 | 802 | 907 | 984  |
| 86 | 182 | 293 | 394 | 488 | 578 | 679 | 810 | 908 | 987  |
| 87 | 184 | 294 | 397 | 493 | 579 | 681 | 813 | 909 | 989  |
| 89 | 186 | 295 | 401 | 498 | 588 | 684 | 818 | 912 | 994  |
| 90 | 187 | 296 | 406 | 500 | 590 | 685 | 821 | 913 | 997  |
| 95 | 188 | 298 | 407 | 501 | 598 | 686 | 824 | 914 | 1002 |

|      |      |      |      |      |      |      |      |      |      |
|------|------|------|------|------|------|------|------|------|------|
| 1004 | 1118 | 1242 | 1338 | 2036 | 2167 | 2315 | 4030 | 4121 | 4203 |
| 1007 | 1119 | 1243 | 1340 | 2037 | 2168 | 2316 | 4032 | 4122 | 4205 |
| 1010 | 1120 | 1244 | 1343 | 2042 | 2171 | 2332 | 4034 | 4127 | 4206 |
| 1014 | 1121 | 1245 | 1346 | 2043 | 2180 | 2333 | 4035 | 4128 | 4208 |
| 1015 | 1122 | 1246 | 1350 | 2045 | 2182 | 2336 | 4036 | 4131 | 4210 |
| 1016 | 1126 | 1247 | 1351 | 2047 | 2183 | 2347 | 4037 | 4133 | 4212 |
| 1023 | 1130 | 1249 | 1352 | 2052 | 2184 | 2357 | 4042 | 4134 | 4213 |
| 1028 | 1131 | 1250 | 1357 | 2055 | 2185 | 2360 | 4043 | 4138 | 4214 |
| 1030 | 1133 | 1251 | 1363 | 2057 | 2187 | 2363 | 4050 | 4143 | 4216 |
| 1031 | 1135 | 1255 | 1378 | 2058 | 2190 | 2367 | 4051 | 4146 | 4217 |
| 1032 | 1138 | 1256 | 1380 | 2060 | 2193 | 2373 | 4053 | 4148 | 4219 |
| 1033 | 1140 | 1260 | 1384 | 2061 | 2194 | 2374 | 4054 | 4149 | 4220 |
| 1034 | 1148 | 1261 | 1387 | 2063 | 2195 | 2376 | 4057 | 4150 | 4222 |
| 1035 | 1149 | 1265 | 1389 | 2068 | 2196 | 2378 | 4058 | 4151 | 4224 |
| 1038 | 1155 | 1267 | 1393 | 2070 | 2199 | 2379 | 4059 | 4155 | 4225 |
| 1040 | 1165 | 1268 | 1394 | 2072 | 2200 | 2380 | 4060 | 4157 | 4226 |
| 1043 | 1168 | 1269 | 1398 | 2073 | 2205 | 2381 | 4061 | 4158 | 4229 |
| 1045 | 1175 | 1271 | 1400 | 2074 | 2208 | 2389 | 4063 | 4159 | 4232 |
| 1046 | 1182 | 1275 | 1406 | 2077 | 2210 | 2390 | 4067 | 4160 | 4234 |
| 1051 | 1183 | 1276 | 1407 | 2079 | 2213 | 2391 | 4071 | 4162 | 4235 |
| 1054 | 1186 | 1277 | 1408 | 2083 | 2216 | 2392 | 4072 | 4164 | 4237 |
| 1057 | 1187 | 1279 | 1411 | 2087 | 2219 | 2394 | 4073 | 4167 | 4240 |
| 1066 | 1188 | 1280 | 1412 | 2093 | 2220 | 2395 | 4075 | 4168 | 4241 |
| 1070 | 1190 | 1282 | 1414 | 2099 | 2225 | 2396 | 4076 | 4169 | 4243 |
| 1072 | 1195 | 1284 | 1417 | 2100 | 2233 | 2398 | 4077 | 4170 | 4244 |
| 1073 | 1197 | 1286 | 1418 | 2106 | 2234 | 2403 | 4079 | 4173 | 4245 |
| 1074 | 1199 | 1288 | 1419 | 2109 | 2237 | 2405 | 4080 | 4175 | 4250 |
| 1075 | 1204 | 1292 | 1420 | 2116 | 2238 | 2407 | 4082 | 4176 | 4251 |
| 1077 | 1206 | 1293 | 1421 | 2119 | 2239 | 4003 | 4084 | 4177 | 4254 |
| 1078 | 1210 | 1294 | 1423 | 2121 | 2240 | 4004 | 4086 | 4179 | 4255 |
| 1080 | 1211 | 1295 | 1425 | 2123 | 2245 | 4005 | 4090 | 4184 | 4256 |
| 1086 | 1212 | 1299 | 1426 | 2124 | 2247 | 4007 | 4093 | 4185 | 4257 |
| 1088 | 1213 | 1300 | 1427 | 2125 | 2248 | 4010 | 4094 | 4186 | 4259 |
| 1092 | 1215 | 1301 | 2002 | 2130 | 2249 | 4012 | 4096 | 4187 | 4262 |
| 1097 | 1217 | 1309 | 2003 | 2133 | 2263 | 4014 | 4100 | 4188 | 4263 |
| 1098 | 1218 | 1311 | 2007 | 2138 | 2264 | 4015 | 4102 | 4189 | 4266 |
| 1099 | 1222 | 1314 | 2010 | 2142 | 2274 | 4018 | 4103 | 4194 | 4268 |
| 1103 | 1224 | 1315 | 2011 | 2146 | 2278 | 4020 | 4104 | 4196 | 4270 |
| 1104 | 1225 | 1318 | 2018 | 2148 | 2284 | 4021 | 4105 | 4197 | 4271 |
| 1106 | 1227 | 1321 | 2022 | 2150 | 2301 | 4022 | 4114 | 4198 | 4272 |
| 1114 | 1231 | 1322 | 2026 | 2151 | 2304 | 4026 | 4115 | 4199 | 4274 |
| 1116 | 1232 | 1326 | 2027 | 2155 | 2307 | 4028 | 4119 | 4200 | 4275 |
| 1117 | 1240 | 1331 | 2031 | 2164 | 2308 | 4029 | 4120 | 4202 | 4276 |

|      |      |      |      |      |      |      |      |      |      |
|------|------|------|------|------|------|------|------|------|------|
| 4277 | 4348 | 4396 | 4448 | 4515 | 4582 | 4635 | 4736 | 4825 | 4920 |
| 4278 | 4349 | 4399 | 4449 | 4516 | 4584 | 4636 | 4741 | 4832 | 4922 |
| 4279 | 4350 | 4400 | 4453 | 4517 | 4585 | 4637 | 4742 | 4835 | 4925 |
| 4281 | 4351 | 4401 | 4455 | 4520 | 4586 | 4643 | 4743 | 4838 | 4926 |
| 4285 | 4352 | 4402 | 4456 | 4521 | 4587 | 4644 | 4744 | 4842 | 4928 |
| 4287 | 4354 | 4403 | 4458 | 4522 | 4590 | 4645 | 4745 | 4844 | 4929 |
| 4288 | 4356 | 4404 | 4462 | 4524 | 4594 | 4646 | 4746 | 4849 | 4936 |
| 4290 | 4357 | 4405 | 4463 | 4530 | 4595 | 4649 | 4750 | 4852 | 4941 |
| 4291 | 4359 | 4406 | 4465 | 4531 | 4596 | 4653 | 4757 | 4857 | 4943 |
| 4292 | 4360 | 4408 | 4466 | 4536 | 4597 | 4654 | 4764 | 4858 | 4944 |
| 4293 | 4363 | 4414 | 4467 | 4538 | 4598 | 4659 | 4765 | 4868 | 4945 |
| 4294 | 4365 | 4415 | 4468 | 4539 | 4599 | 4661 | 4767 | 4869 | 4947 |
| 4297 | 4366 | 4417 | 4473 | 4540 | 4601 | 4668 | 4769 | 4871 | 4955 |
| 4300 | 4369 | 4419 | 4475 | 4542 | 4603 | 4671 | 4777 | 4873 | 4958 |
| 4301 | 4371 | 4420 | 4476 | 4543 | 4604 | 4674 | 4780 | 4874 | 4960 |
| 4302 | 4372 | 4421 | 4480 | 4545 | 4605 | 4675 | 4784 | 4876 | 4966 |
| 4303 | 4376 | 4422 | 4482 | 4547 | 4607 | 4678 | 4791 | 4877 | 4974 |
| 4309 | 4377 | 4423 | 4483 | 4548 | 4610 | 4679 | 4793 | 4883 | 4976 |
| 4310 | 4380 | 4426 | 4485 | 4552 | 4611 | 4680 | 4796 | 4885 | 4985 |
| 4311 | 4381 | 4427 | 4488 | 4553 | 4612 | 4689 | 4798 | 4888 | 4986 |
| 4312 | 4382 | 4428 | 4489 | 4555 | 4613 | 4694 | 4799 | 4889 | 4987 |
| 4313 | 4383 | 4429 | 4491 | 4556 | 4614 | 4706 | 4803 | 4891 | 4989 |
| 4320 | 4384 | 4430 | 4496 | 4557 | 4616 | 4708 | 4804 | 4893 | 5000 |
| 4324 | 4385 | 4431 | 4498 | 4558 | 4620 | 4711 | 4805 | 4896 | 5004 |
| 4327 | 4386 | 4432 | 4499 | 4559 | 4621 | 4712 | 4806 | 4897 | 5007 |
| 4328 | 4387 | 4434 | 4502 | 4560 | 4623 | 4713 | 4807 | 4898 | 5014 |
| 4331 | 4389 | 4438 | 4503 | 4562 | 4624 | 4714 | 4809 | 4899 | 5026 |
| 4332 | 4390 | 4441 | 4505 | 4565 | 4626 | 4715 | 4813 | 4902 | 5031 |
| 4335 | 4391 | 4442 | 4507 | 4566 | 4629 | 4720 | 4814 | 4904 | 5047 |
| 4337 | 4392 | 4443 | 4508 | 4571 | 4630 | 4721 | 4815 | 4907 | 5066 |
| 4339 | 4393 | 4444 | 4510 | 4576 | 4631 | 4722 | 4816 | 4909 | 5099 |
| 4343 | 4394 | 4445 | 4513 | 4578 | 4632 | 4723 | 4817 | 4917 | 5135 |
| 4345 | 4395 | 4447 | 4514 | 4580 | 4633 | 4729 | 4823 | 4919 | 5160 |

**Supplementary Table 2.** ADNI roster ID numbers and diagnoses based on ADNI criteria and neuropsychological criteria.

| <b>RID</b> | <b>ADNI<br/>criteria</b> | <b>Neuropsychological<br/>criteria</b> |     |        |        |
|------------|--------------------------|----------------------------------------|-----|--------|--------|
|            |                          |                                        | 103 | MCI    | Normal |
|            |                          |                                        | 107 | MCI    | Normal |
| 5          | Normal                   | Normal                                 | 108 | MCI    | MCI    |
| 6          | MCI                      | MCI                                    | 111 | MCI    | MCI    |
| 8          | Normal                   | Normal                                 | 112 | MCI    | Normal |
| 14         | Normal                   | Normal                                 | 116 | MCI    | Normal |
| 16         | Normal                   | Normal                                 | 120 | Normal | Normal |
| 19         | Normal                   | Normal                                 | 125 | Normal | Normal |
| 21         | Normal                   | Normal                                 | 126 | MCI    | Normal |
| 23         | Normal                   | Normal                                 | 128 | MCI    | MCI    |
| 30         | MCI                      | MCI                                    | 130 | Normal | Normal |
| 31         | Normal                   | Normal                                 | 135 | MCI    | Normal |
| 38         | MCI                      | MCI                                    | 138 | MCI    | Normal |
| 40         | Normal                   | Normal                                 | 141 | MCI    | MCI    |
| 41         | MCI                      | MCI                                    | 142 | MCI    | Normal |
| 42         | MCI                      | MCI                                    | 150 | MCI    | Normal |
| 43         | Normal                   | Normal                                 | 155 | MCI    | Normal |
| 44         | MCI                      | MCI                                    | 158 | MCI    | Normal |
| 45         | MCI                      | MCI                                    | 159 | Normal | Normal |
| 47         | Normal                   | Normal                                 | 160 | MCI    | MCI    |
| 48         | Normal                   | Normal                                 | 161 | MCI    | MCI    |
| 50         | MCI                      | MCI                                    | 168 | MCI    | Normal |
| 51         | MCI                      | Normal                                 | 169 | MCI    | Normal |
| 54         | MCI                      | MCI                                    | 172 | Normal | Normal |
| 57         | MCI                      | MCI                                    | 173 | Normal | Normal |
| 58         | Normal                   | Normal                                 | 176 | MCI    | MCI    |
| 60         | MCI                      | MCI                                    | 177 | Normal | Normal |
| 66         | Normal                   | Normal                                 | 178 | MCI    | Normal |
| 67         | Normal                   | Normal                                 | 179 | MCI    | MCI    |
| 68         | Normal                   | Normal                                 | 182 | MCI    | MCI    |
| 70         | Normal                   | Normal                                 | 184 | Normal | Normal |
| 72         | Normal                   | Normal                                 | 186 | Normal | Normal |
| 74         | Normal                   | Normal                                 | 187 | MCI    | MCI    |
| 77         | MCI                      | MCI                                    | 188 | MCI    | MCI    |
| 80         | MCI                      | Normal                                 | 195 | MCI    | Normal |
| 81         | Normal                   | Normal                                 | 196 | Normal | Normal |
| 86         | Normal                   | Normal                                 | 200 | MCI    | Normal |
| 87         | MCI                      | MCI                                    | 204 | MCI    | MCI    |
| 89         | Normal                   | Normal                                 | 205 | MCI    | Normal |
| 90         | Normal                   | Normal                                 | 214 | MCI    | MCI    |
| 95         | Normal                   | Normal                                 | 217 | MCI    | Normal |
| 96         | Normal                   | Normal                                 | 222 | MCI    | MCI    |
| 97         | Normal                   | Normal                                 | 225 | MCI    | Normal |
| 98         | MCI                      | MCI                                    | 227 | MCI    | Normal |
| 101        | MCI                      | MCI                                    | 229 | Normal | Normal |
| 102        | MCI                      | MCI                                    | 230 | Normal | Normal |

|     |        |        |     |        |        |
|-----|--------|--------|-----|--------|--------|
| 231 | MCI    | MCI    | 359 | Normal | Normal |
| 240 | MCI    | Normal | 361 | MCI    | MCI    |
| 241 | MCI    | Normal | 362 | MCI    | Normal |
| 243 | MCI    | MCI    | 363 | Normal | Normal |
| 249 | MCI    | MCI    | 369 | Normal | Normal |
| 256 | MCI    | MCI    | 376 | MCI    | Normal |
| 257 | Normal | Normal | 377 | MCI    | Normal |
| 258 | MCI    | MCI    | 378 | MCI    | Normal |
| 262 | Normal | MCI    | 382 | Normal | Normal |
| 269 | MCI    | MCI    | 384 | MCI    | Normal |
| 272 | Normal | Normal | 386 | Normal | Normal |
| 273 | MCI    | MCI    | 388 | MCI    | MCI    |
| 276 | MCI    | Normal | 389 | MCI    | Normal |
| 282 | MCI    | Normal | 390 | MCI    | Normal |
| 283 | Normal | Normal | 393 | MCI    | Normal |
| 284 | MCI    | MCI    | 394 | MCI    | MCI    |
| 285 | MCI    | Normal | 397 | MCI    | Normal |
| 288 | MCI    | Normal | 401 | MCI    | Normal |
| 289 | MCI    | Normal | 406 | MCI    | MCI    |
| 290 | MCI    | Normal | 407 | MCI    | Normal |
| 291 | MCI    | Normal | 408 | MCI    | MCI    |
| 292 | MCI    | MCI    | 409 | MCI    | MCI    |
| 293 | MCI    | MCI    | 410 | MCI    | Normal |
| 294 | MCI    | MCI    | 413 | Normal | Normal |
| 295 | Normal | Normal | 414 | MCI    | MCI    |
| 296 | MCI    | MCI    | 416 | Normal | Normal |
| 298 | Normal | Normal | 417 | MCI    | MCI    |
| 301 | Normal | Normal | 419 | Normal | Normal |
| 303 | Normal | Normal | 422 | MCI    | Normal |
| 307 | MCI    | MCI    | 423 | MCI    | MCI    |
| 312 | Normal | Normal | 424 | MCI    | Normal |
| 314 | MCI    | MCI    | 425 | Normal | Normal |
| 315 | Normal | Normal | 429 | MCI    | MCI    |
| 319 | Normal | Normal | 433 | Normal | Normal |
| 324 | MCI    | Normal | 434 | MCI    | MCI    |
| 325 | MCI    | MCI    | 441 | Normal | Normal |
| 326 | MCI    | MCI    | 442 | MCI    | Normal |
| 327 | Normal | Normal | 443 | MCI    | Normal |
| 331 | MCI    | MCI    | 445 | MCI    | MCI    |
| 336 | MCI    | MCI    | 446 | MCI    | Normal |
| 337 | Normal | Normal | 448 | MCI    | Normal |
| 339 | MCI    | MCI    | 449 | MCI    | Normal |
| 344 | MCI    | Normal | 450 | MCI    | Normal |
| 351 | MCI    | Normal | 458 | MCI    | MCI    |
| 352 | Normal | Normal | 461 | MCI    | MCI    |
| 354 | MCI    | Normal | 464 | MCI    | Normal |

|     |        |        |     |        |        |
|-----|--------|--------|-----|--------|--------|
| 469 | MCI    | MCI    | 576 | Normal | Normal |
| 472 | Normal | Normal | 578 | Normal | Normal |
| 473 | Normal | Normal | 579 | MCI    | Normal |
| 476 | MCI    | MCI    | 588 | MCI    | MCI    |
| 478 | MCI    | MCI    | 590 | MCI    | MCI    |
| 479 | Normal | Normal | 598 | MCI    | Normal |
| 481 | MCI    | Normal | 601 | Normal | Normal |
| 485 | MCI    | MCI    | 602 | Normal | Normal |
| 488 | Normal | MCI    | 604 | MCI    | Normal |
| 493 | Normal | Normal | 607 | MCI    | Normal |
| 498 | Normal | Normal | 608 | MCI    | MCI    |
| 500 | Normal | Normal | 610 | Normal | Normal |
| 501 | MCI    | Normal | 611 | MCI    | Normal |
| 502 | Normal | Normal | 613 | MCI    | Normal |
| 505 | MCI    | Normal | 618 | Normal | Normal |
| 507 | MCI    | MCI    | 621 | MCI    | Normal |
| 511 | MCI    | MCI    | 625 | MCI    | MCI    |
| 513 | MCI    | Normal | 626 | MCI    | Normal |
| 514 | MCI    | Normal | 629 | MCI    | MCI    |
| 516 | Normal | Normal | 631 | MCI    | MCI    |
| 518 | MCI    | MCI    | 634 | MCI    | Normal |
| 519 | Normal | Normal | 637 | Normal | Normal |
| 520 | Normal | MCI    | 638 | MCI    | MCI    |
| 522 | Normal | Normal | 641 | MCI    | MCI    |
| 525 | Normal | Normal | 643 | Normal | Normal |
| 526 | Normal | MCI    | 644 | MCI    | MCI    |
| 531 | MCI    | Normal | 647 | Normal | Normal |
| 533 | Normal | Normal | 648 | Normal | Normal |
| 534 | Normal | Normal | 649 | MCI    | Normal |
| 538 | Normal | Normal | 656 | MCI    | MCI    |
| 539 | MCI    | MCI    | 657 | Normal | Normal |
| 544 | MCI    | MCI    | 658 | MCI    | MCI    |
| 545 | Normal | Normal | 667 | MCI    | MCI    |
| 546 | MCI    | Normal | 668 | MCI    | Normal |
| 549 | MCI    | MCI    | 669 | MCI    | Normal |
| 551 | MCI    | Normal | 671 | MCI    | MCI    |
| 552 | MCI    | MCI    | 672 | Normal | Normal |
| 553 | Normal | Normal | 673 | MCI    | MCI    |
| 557 | MCI    | Normal | 675 | MCI    | Normal |
| 559 | Normal | Normal | 677 | Normal | Normal |
| 563 | MCI    | Normal | 679 | MCI    | Normal |
| 566 | MCI    | Normal | 681 | Normal | Normal |
| 567 | MCI    | MCI    | 684 | Normal | Normal |
| 568 | MCI    | MCI    | 685 | Normal | Normal |
| 572 | MCI    | MCI    | 686 | Normal | Normal |
| 575 | Normal | Normal | 695 | MCI    | MCI    |

|     |        |        |     |        |        |
|-----|--------|--------|-----|--------|--------|
| 697 | MCI    | MCI    | 851 | MCI    | MCI    |
| 698 | MCI    | Normal | 855 | MCI    | Normal |
| 702 | MCI    | Normal | 856 | MCI    | MCI    |
| 708 | MCI    | MCI    | 860 | MCI    | MCI    |
| 709 | MCI    | MCI    | 861 | MCI    | Normal |
| 711 | Normal | Normal | 862 | Normal | Normal |
| 715 | MCI    | Normal | 863 | Normal | Normal |
| 718 | MCI    | Normal | 865 | MCI    | MCI    |
| 721 | MCI    | Normal | 866 | Normal | Normal |
| 722 | MCI    | Normal | 867 | MCI    | Normal |
| 723 | MCI    | MCI    | 869 | MCI    | MCI    |
| 725 | MCI    | Normal | 871 | MCI    | MCI    |
| 726 | Normal | Normal | 872 | MCI    | MCI    |
| 727 | MCI    | MCI    | 873 | MCI    | MCI    |
| 729 | MCI    | MCI    | 874 | MCI    | MCI    |
| 731 | Normal | Normal | 878 | MCI    | MCI    |
| 734 | Normal | Normal | 880 | MCI    | MCI    |
| 741 | Normal | Normal | 886 | Normal | Normal |
| 746 | MCI    | Normal | 887 | MCI    | MCI    |
| 748 | MCI    | MCI    | 890 | MCI    | MCI    |
| 750 | MCI    | MCI    | 892 | MCI    | Normal |
| 751 | Normal | Normal | 896 | Normal | Normal |
| 752 | MCI    | MCI    | 898 | Normal | Normal |
| 767 | Normal | Normal | 904 | MCI    | MCI    |
| 768 | Normal | Normal | 906 | MCI    | MCI    |
| 769 | MCI    | MCI    | 907 | Normal | Normal |
| 770 | MCI    | Normal | 908 | MCI    | MCI    |
| 771 | MCI    | Normal | 909 | MCI    | MCI    |
| 782 | MCI    | Normal | 912 | MCI    | MCI    |
| 783 | MCI    | Normal | 913 | MCI    | MCI    |
| 792 | MCI    | MCI    | 914 | MCI    | MCI    |
| 800 | MCI    | Normal | 915 | MCI    | MCI    |
| 802 | MCI    | Normal | 917 | MCI    | MCI    |
| 810 | Normal | Normal | 919 | MCI    | Normal |
| 813 | Normal | Normal | 920 | Normal | Normal |
| 818 | Normal | MCI    | 921 | MCI    | MCI    |
| 821 | MCI    | Normal | 922 | MCI    | MCI    |
| 824 | Normal | Normal | 923 | Normal | Normal |
| 825 | MCI    | Normal | 924 | MCI    | MCI    |
| 830 | MCI    | Normal | 925 | MCI    | MCI    |
| 832 | MCI    | MCI    | 926 | Normal | Normal |
| 834 | MCI    | MCI    | 928 | MCI    | Normal |
| 835 | MCI    | MCI    | 930 | MCI    | MCI    |
| 839 | MCI    | MCI    | 931 | Normal | Normal |
| 842 | Normal | Normal | 932 | MCI    | MCI    |
| 845 | Normal | Normal | 934 | Normal | Normal |

|      |        |        |      |        |        |
|------|--------|--------|------|--------|--------|
| 941  | MCI    | MCI    | 1066 | MCI    | Normal |
| 945  | MCI    | MCI    | 1070 | MCI    | MCI    |
| 947  | MCI    | Normal | 1072 | MCI    | MCI    |
| 950  | MCI    | MCI    | 1073 | MCI    | MCI    |
| 951  | Normal | Normal | 1074 | MCI    | Normal |
| 952  | MCI    | MCI    | 1075 | MCI    | Normal |
| 954  | MCI    | MCI    | 1077 | MCI    | MCI    |
| 957  | MCI    | MCI    | 1078 | MCI    | MCI    |
| 958  | MCI    | Normal | 1080 | MCI    | Normal |
| 961  | MCI    | MCI    | 1086 | Normal | Normal |
| 963  | Normal | Normal | 1088 | MCI    | Normal |
| 967  | Normal | MCI    | 1092 | MCI    | MCI    |
| 969  | Normal | Normal | 1097 | MCI    | MCI    |
| 973  | MCI    | MCI    | 1098 | Normal | Normal |
| 976  | MCI    | MCI    | 1099 | Normal | Normal |
| 978  | MCI    | MCI    | 1103 | MCI    | MCI    |
| 981  | Normal | Normal | 1104 | MCI    | MCI    |
| 982  | MCI    | MCI    | 1106 | MCI    | MCI    |
| 984  | Normal | Normal | 1114 | MCI    | MCI    |
| 987  | MCI    | MCI    | 1116 | MCI    | Normal |
| 989  | MCI    | Normal | 1117 | MCI    | MCI    |
| 994  | MCI    | MCI    | 1118 | MCI    | MCI    |
| 997  | MCI    | MCI    | 1119 | MCI    | Normal |
| 1002 | Normal | Normal | 1120 | MCI    | MCI    |
| 1004 | MCI    | MCI    | 1121 | MCI    | MCI    |
| 1007 | MCI    | Normal | 1122 | MCI    | Normal |
| 1010 | MCI    | Normal | 1126 | MCI    | MCI    |
| 1014 | Normal | MCI    | 1130 | MCI    | Normal |
| 1015 | MCI    | MCI    | 1131 | MCI    | MCI    |
| 1016 | Normal | Normal | 1133 | Normal | Normal |
| 1023 | Normal | Normal | 1135 | MCI    | Normal |
| 1028 | MCI    | MCI    | 1138 | MCI    | MCI    |
| 1030 | MCI    | MCI    | 1140 | MCI    | Normal |
| 1031 | MCI    | Normal | 1148 | MCI    | Normal |
| 1032 | MCI    | Normal | 1149 | MCI    | Normal |
| 1033 | MCI    | MCI    | 1155 | MCI    | MCI    |
| 1034 | MCI    | MCI    | 1165 | MCI    | Normal |
| 1035 | Normal | Normal | 1168 | MCI    | Normal |
| 1038 | MCI    | Normal | 1175 | MCI    | MCI    |
| 1040 | MCI    | MCI    | 1182 | MCI    | Normal |
| 1043 | MCI    | Normal | 1183 | MCI    | MCI    |
| 1045 | MCI    | Normal | 1186 | MCI    | Normal |
| 1046 | MCI    | Normal | 1187 | MCI    | MCI    |
| 1051 | MCI    | MCI    | 1188 | MCI    | Normal |
| 1054 | MCI    | MCI    | 1190 | Normal | Normal |
| 1057 | MCI    | MCI    | 1195 | Normal | Normal |

|      |        |        |      |        |        |
|------|--------|--------|------|--------|--------|
| 1197 | Normal | Normal | 1293 | MCI    | Normal |
| 1199 | MCI    | MCI    | 1294 | MCI    | MCI    |
| 1204 | MCI    | MCI    | 1295 | MCI    | MCI    |
| 1206 | Normal | Normal | 1299 | MCI    | MCI    |
| 1210 | MCI    | Normal | 1300 | MCI    | Normal |
| 1211 | MCI    | Normal | 1301 | Normal | Normal |
| 1212 | Normal | Normal | 1309 | MCI    | MCI    |
| 1213 | MCI    | MCI    | 1311 | MCI    | MCI    |
| 1215 | MCI    | Normal | 1314 | MCI    | Normal |
| 1217 | MCI    | Normal | 1315 | MCI    | MCI    |
| 1218 | MCI    | Normal | 1318 | MCI    | MCI    |
| 1222 | Normal | Normal | 1321 | MCI    | MCI    |
| 1224 | MCI    | Normal | 1322 | MCI    | MCI    |
| 1225 | MCI    | MCI    | 1326 | MCI    | MCI    |
| 1227 | MCI    | Normal | 1331 | MCI    | MCI    |
| 1231 | MCI    | MCI    | 1338 | MCI    | MCI    |
| 1232 | Normal | Normal | 1340 | MCI    | MCI    |
| 1240 | MCI    | MCI    | 1343 | MCI    | Normal |
| 1242 | Normal | Normal | 1346 | MCI    | Normal |
| 1243 | MCI    | Normal | 1350 | MCI    | MCI    |
| 1244 | MCI    | MCI    | 1351 | MCI    | Normal |
| 1245 | MCI    | Normal | 1352 | MCI    | Normal |
| 1246 | MCI    | MCI    | 1357 | MCI    | Normal |
| 1247 | MCI    | MCI    | 1363 | MCI    | MCI    |
| 1249 | Normal | Normal | 1378 | MCI    | MCI    |
| 1250 | Normal | Normal | 1380 | MCI    | MCI    |
| 1251 | Normal | Normal | 1384 | MCI    | MCI    |
| 1255 | MCI    | Normal | 1387 | MCI    | MCI    |
| 1256 | Normal | Normal | 1389 | MCI    | MCI    |
| 1260 | MCI    | MCI    | 1393 | MCI    | MCI    |
| 1261 | Normal | Normal | 1394 | MCI    | MCI    |
| 1265 | MCI    | MCI    | 1398 | MCI    | MCI    |
| 1267 | Normal | Normal | 1400 | MCI    | Normal |
| 1268 | MCI    | MCI    | 1406 | MCI    | Normal |
| 1269 | MCI    | Normal | 1407 | MCI    | MCI    |
| 1271 | MCI    | Normal | 1408 | MCI    | Normal |
| 1275 | MCI    | Normal | 1411 | MCI    | Normal |
| 1276 | Normal | Normal | 1412 | MCI    | MCI    |
| 1277 | MCI    | MCI    | 1414 | MCI    | MCI    |
| 1279 | MCI    | Normal | 1417 | MCI    | MCI    |
| 1280 | Normal | Normal | 1418 | MCI    | Normal |
| 1282 | MCI    | MCI    | 1419 | MCI    | Normal |
| 1284 | MCI    | MCI    | 1420 | MCI    | MCI    |
| 1286 | Normal | Normal | 1421 | MCI    | Normal |
| 1288 | Normal | Normal | 1423 | MCI    | Normal |
| 1292 | MCI    | MCI    | 1425 | MCI    | MCI    |

|      |     |        |      |     |        |
|------|-----|--------|------|-----|--------|
| 1426 | MCI | Normal | 2133 | MCI | Normal |
| 1427 | MCI | MCI    | 2138 | MCI | MCI    |
| 2002 | MCI | Normal | 2142 | MCI | Normal |
| 2003 | MCI | Normal | 2146 | MCI | Normal |
| 2007 | MCI | Normal | 2148 | MCI | Normal |
| 2010 | MCI | Normal | 2150 | MCI | Normal |
| 2011 | MCI | Normal | 2151 | MCI | Normal |
| 2018 | MCI | Normal | 2155 | MCI | Normal |
| 2022 | MCI | Normal | 2164 | MCI | Normal |
| 2026 | MCI | Normal | 2167 | MCI | Normal |
| 2027 | MCI | Normal | 2168 | MCI | Normal |
| 2031 | MCI | Normal | 2171 | MCI | Normal |
| 2036 | MCI | Normal | 2180 | MCI | MCI    |
| 2037 | MCI | Normal | 2182 | MCI | Normal |
| 2042 | MCI | MCI    | 2183 | MCI | Normal |
| 2043 | MCI | Normal | 2184 | MCI | Normal |
| 2045 | MCI | Normal | 2185 | MCI | Normal |
| 2047 | MCI | MCI    | 2187 | MCI | Normal |
| 2052 | MCI | Normal | 2190 | MCI | Normal |
| 2055 | MCI | Normal | 2193 | MCI | Normal |
| 2057 | MCI | Normal | 2194 | MCI | MCI    |
| 2058 | MCI | MCI    | 2195 | MCI | Normal |
| 2060 | MCI | Normal | 2196 | MCI | MCI    |
| 2061 | MCI | Normal | 2199 | MCI | Normal |
| 2063 | MCI | MCI    | 2200 | MCI | Normal |
| 2068 | MCI | Normal | 2205 | MCI | MCI    |
| 2070 | MCI | MCI    | 2208 | MCI | Normal |
| 2072 | MCI | Normal | 2210 | MCI | MCI    |
| 2073 | MCI | Normal | 2213 | MCI | Normal |
| 2074 | MCI | Normal | 2216 | MCI | MCI    |
| 2077 | MCI | Normal | 2219 | MCI | Normal |
| 2079 | MCI | Normal | 2220 | MCI | Normal |
| 2083 | MCI | Normal | 2225 | MCI | Normal |
| 2087 | MCI | MCI    | 2233 | MCI | Normal |
| 2093 | MCI | Normal | 2234 | MCI | Normal |
| 2099 | MCI | Normal | 2237 | MCI | Normal |
| 2100 | MCI | Normal | 2238 | MCI | Normal |
| 2106 | MCI | MCI    | 2239 | MCI | Normal |
| 2109 | MCI | MCI    | 2240 | MCI | Normal |
| 2116 | MCI | MCI    | 2245 | MCI | Normal |
| 2119 | MCI | Normal | 2247 | MCI | Normal |
| 2121 | MCI | Normal | 2248 | MCI | MCI    |
| 2123 | MCI | Normal | 2249 | MCI | Normal |
| 2124 | MCI | Normal | 2263 | MCI | Normal |
| 2125 | MCI | Normal | 2264 | MCI | Normal |
| 2130 | MCI | Normal | 2274 | MCI | MCI    |

|      |        |        |      |        |        |
|------|--------|--------|------|--------|--------|
| 2278 | MCI    | Normal | 4026 | Normal | Normal |
| 2284 | MCI    | MCI    | 4028 | Normal | Normal |
| 2301 | MCI    | Normal | 4029 | MCI    | Normal |
| 2304 | MCI    | Normal | 4030 | MCI    | Normal |
| 2307 | MCI    | Normal | 4032 | Normal | Normal |
| 2308 | MCI    | Normal | 4034 | MCI    | MCI    |
| 2315 | MCI    | Normal | 4035 | MCI    | Normal |
| 2316 | MCI    | MCI    | 4036 | MCI    | Normal |
| 2332 | MCI    | Normal | 4037 | Normal | Normal |
| 2333 | MCI    | Normal | 4042 | MCI    | Normal |
| 2336 | MCI    | Normal | 4043 | Normal | Normal |
| 2347 | MCI    | Normal | 4050 | Normal | Normal |
| 2357 | MCI    | Normal | 4051 | MCI    | Normal |
| 2360 | MCI    | Normal | 4053 | MCI    | MCI    |
| 2363 | MCI    | MCI    | 4054 | MCI    | Normal |
| 2367 | MCI    | MCI    | 4057 | MCI    | MCI    |
| 2373 | MCI    | Normal | 4058 | MCI    | MCI    |
| 2374 | MCI    | Normal | 4059 | MCI    | Normal |
| 2376 | MCI    | Normal | 4060 | Normal | Normal |
| 2378 | MCI    | Normal | 4061 | MCI    | Normal |
| 2379 | MCI    | MCI    | 4063 | MCI    | Normal |
| 2380 | MCI    | MCI    | 4067 | MCI    | Normal |
| 2381 | MCI    | Normal | 4071 | Normal | Normal |
| 2389 | MCI    | Normal | 4072 | MCI    | Normal |
| 2390 | MCI    | Normal | 4073 | MCI    | Normal |
| 2391 | MCI    | Normal | 4075 | Normal | Normal |
| 2392 | MCI    | MCI    | 4076 | Normal | Normal |
| 2394 | MCI    | Normal | 4077 | MCI    | Normal |
| 2395 | MCI    | Normal | 4079 | MCI    | MCI    |
| 2396 | MCI    | Normal | 4080 | Normal | Normal |
| 2398 | MCI    | Normal | 4082 | Normal | Normal |
| 2403 | MCI    | MCI    | 4084 | Normal | Normal |
| 2405 | MCI    | Normal | 4086 | Normal | Normal |
| 2407 | MCI    | Normal | 4090 | Normal | Normal |
| 4003 | Normal | Normal | 4093 | Normal | Normal |
| 4004 | MCI    | Normal | 4094 | MCI    | MCI    |
| 4005 | MCI    | MCI    | 4096 | MCI    | MCI    |
| 4007 | MCI    | Normal | 4100 | Normal | Normal |
| 4010 | Normal | Normal | 4102 | MCI    | MCI    |
| 4012 | MCI    | Normal | 4103 | Normal | MCI    |
| 4014 | Normal | Normal | 4104 | Normal | Normal |
| 4015 | MCI    | MCI    | 4105 | Normal | Normal |
| 4018 | Normal | Normal | 4114 | MCI    | MCI    |
| 4020 | Normal | MCI    | 4115 | MCI    | Normal |
| 4021 | Normal | Normal | 4119 | Normal | Normal |
| 4022 | MCI    | MCI    | 4120 | Normal | Normal |

|      |        |        |      |        |        |
|------|--------|--------|------|--------|--------|
| 4121 | Normal | Normal | 4208 | Normal | Normal |
| 4122 | MCI    | Normal | 4210 | MCI    | Normal |
| 4127 | MCI    | Normal | 4212 | MCI    | Normal |
| 4128 | MCI    | Normal | 4213 | Normal | Normal |
| 4131 | MCI    | MCI    | 4214 | MCI    | MCI    |
| 4133 | MCI    | Normal | 4216 | MCI    | Normal |
| 4134 | MCI    | Normal | 4217 | MCI    | Normal |
| 4138 | MCI    | MCI    | 4219 | MCI    | Normal |
| 4143 | MCI    | MCI    | 4220 | MCI    | Normal |
| 4146 | MCI    | Normal | 4222 | Normal | Normal |
| 4148 | Normal | Normal | 4224 | Normal | Normal |
| 4149 | MCI    | Normal | 4225 | Normal | Normal |
| 4150 | Normal | Normal | 4226 | MCI    | Normal |
| 4151 | Normal | Normal | 4229 | MCI    | MCI    |
| 4155 | Normal | Normal | 4232 | MCI    | Normal |
| 4157 | MCI    | Normal | 4234 | Normal | MCI    |
| 4158 | Normal | Normal | 4235 | MCI    | MCI    |
| 4159 | MCI    | Normal | 4237 | MCI    | MCI    |
| 4160 | MCI    | MCI    | 4240 | MCI    | MCI    |
| 4162 | MCI    | MCI    | 4241 | MCI    | Normal |
| 4164 | Normal | Normal | 4243 | MCI    | MCI    |
| 4167 | MCI    | MCI    | 4244 | MCI    | Normal |
| 4168 | MCI    | Normal | 4245 | MCI    | MCI    |
| 4169 | MCI    | Normal | 4250 | MCI    | MCI    |
| 4170 | MCI    | Normal | 4251 | MCI    | Normal |
| 4173 | Normal | Normal | 4254 | Normal | Normal |
| 4175 | MCI    | MCI    | 4255 | Normal | Normal |
| 4176 | Normal | Normal | 4256 | MCI    | Normal |
| 4177 | Normal | Normal | 4257 | Normal | Normal |
| 4179 | Normal | Normal | 4259 | MCI    | Normal |
| 4184 | MCI    | Normal | 4262 | Normal | Normal |
| 4185 | MCI    | Normal | 4263 | MCI    | Normal |
| 4186 | MCI    | MCI    | 4266 | Normal | Normal |
| 4187 | MCI    | Normal | 4268 | MCI    | Normal |
| 4188 | MCI    | MCI    | 4270 | Normal | Normal |
| 4189 | MCI    | MCI    | 4271 | MCI    | Normal |
| 4194 | MCI    | Normal | 4272 | MCI    | MCI    |
| 4196 | Normal | Normal | 4274 | MCI    | Normal |
| 4197 | MCI    | Normal | 4275 | Normal | Normal |
| 4198 | Normal | Normal | 4276 | Normal | Normal |
| 4199 | MCI    | Normal | 4277 | Normal | Normal |
| 4200 | Normal | Normal | 4278 | Normal | MCI    |
| 4202 | MCI    | MCI    | 4279 | Normal | Normal |
| 4203 | MCI    | MCI    | 4281 | MCI    | Normal |
| 4205 | MCI    | Normal | 4285 | MCI    | MCI    |
| 4206 | MCI    | Normal | 4287 | MCI    | MCI    |

|      |        |        |      |        |        |
|------|--------|--------|------|--------|--------|
| 4288 | Normal | Normal | 4381 | MCI    | Normal |
| 4290 | Normal | Normal | 4382 | Normal | Normal |
| 4291 | Normal | Normal | 4383 | MCI    | Normal |
| 4292 | Normal | Normal | 4384 | Normal | Normal |
| 4293 | MCI    | MCI    | 4385 | Normal | Normal |
| 4294 | MCI    | MCI    | 4386 | Normal | Normal |
| 4297 | MCI    | MCI    | 4387 | Normal | Normal |
| 4300 | MCI    | Normal | 4389 | Normal | Normal |
| 4301 | MCI    | MCI    | 4390 | MCI    | MCI    |
| 4302 | MCI    | MCI    | 4391 | Normal | Normal |
| 4303 | MCI    | Normal | 4392 | MCI    | MCI    |
| 4309 | MCI    | Normal | 4393 | Normal | Normal |
| 4310 | MCI    | Normal | 4394 | MCI    | Normal |
| 4311 | MCI    | Normal | 4395 | MCI    | Normal |
| 4312 | MCI    | Normal | 4396 | Normal | Normal |
| 4313 | Normal | MCI    | 4399 | Normal | Normal |
| 4320 | Normal | Normal | 4400 | Normal | Normal |
| 4324 | MCI    | MCI    | 4401 | Normal | Normal |
| 4327 | MCI    | Normal | 4402 | MCI    | MCI    |
| 4328 | MCI    | MCI    | 4403 | MCI    | MCI    |
| 4331 | MCI    | Normal | 4404 | MCI    | Normal |
| 4332 | MCI    | Normal | 4405 | MCI    | Normal |
| 4335 | Normal | Normal | 4406 | MCI    | Normal |
| 4337 | Normal | Normal | 4408 | MCI    | Normal |
| 4339 | Normal | Normal | 4414 | MCI    | MCI    |
| 4343 | Normal | Normal | 4415 | MCI    | MCI    |
| 4345 | Normal | Normal | 4417 | MCI    | Normal |
| 4348 | Normal | Normal | 4419 | MCI    | Normal |
| 4349 | Normal | Normal | 4420 | MCI    | Normal |
| 4350 | Normal | Normal | 4421 | Normal | Normal |
| 4351 | MCI    | Normal | 4422 | Normal | Normal |
| 4352 | Normal | Normal | 4423 | MCI    | MCI    |
| 4354 | MCI    | MCI    | 4426 | MCI    | Normal |
| 4356 | MCI    | Normal | 4427 | Normal | MCI    |
| 4357 | Normal | Normal | 4428 | Normal | Normal |
| 4359 | MCI    | Normal | 4429 | Normal | Normal |
| 4360 | MCI    | Normal | 4430 | MCI    | MCI    |
| 4363 | MCI    | Normal | 4431 | MCI    | Normal |
| 4365 | Normal | MCI    | 4432 | MCI    | MCI    |
| 4366 | MCI    | MCI    | 4434 | MCI    | Normal |
| 4369 | Normal | Normal | 4438 | MCI    | MCI    |
| 4371 | Normal | Normal | 4441 | Normal | Normal |
| 4372 | Normal | Normal | 4442 | Normal | Normal |
| 4376 | Normal | Normal | 4443 | MCI    | Normal |
| 4377 | MCI    | Normal | 4444 | MCI    | Normal |
| 4380 | MCI    | Normal | 4445 | MCI    | Normal |

|      |        |        |      |        |        |
|------|--------|--------|------|--------|--------|
| 4447 | MCI    | Normal | 4540 | MCI    | Normal |
| 4448 | Normal | Normal | 4542 | MCI    | MCI    |
| 4449 | Normal | Normal | 4543 | MCI    | Normal |
| 4453 | Normal | Normal | 4545 | Normal | Normal |
| 4455 | MCI    | MCI    | 4547 | MCI    | Normal |
| 4456 | MCI    | MCI    | 4548 | MCI    | Normal |
| 4458 | MCI    | MCI    | 4552 | Normal | Normal |
| 4462 | MCI    | Normal | 4553 | MCI    | Normal |
| 4463 | MCI    | Normal | 4555 | Normal | MCI    |
| 4465 | MCI    | Normal | 4556 | MCI    | Normal |
| 4466 | Normal | Normal | 4557 | MCI    | Normal |
| 4467 | MCI    | MCI    | 4558 | Normal | Normal |
| 4468 | MCI    | Normal | 4559 | Normal | Normal |
| 4473 | MCI    | Normal | 4560 | Normal | Normal |
| 4475 | MCI    | MCI    | 4562 | MCI    | MCI    |
| 4476 | MCI    | MCI    | 4565 | MCI    | MCI    |
| 4480 | MCI    | MCI    | 4566 | Normal | Normal |
| 4482 | Normal | Normal | 4571 | MCI    | Normal |
| 4483 | Normal | Normal | 4576 | Normal | Normal |
| 4485 | Normal | Normal | 4578 | Normal | Normal |
| 4488 | Normal | Normal | 4580 | Normal | Normal |
| 4489 | MCI    | Normal | 4582 | MCI    | MCI    |
| 4491 | Normal | Normal | 4584 | MCI    | Normal |
| 4496 | Normal | Normal | 4585 | Normal | Normal |
| 4498 | MCI    | MCI    | 4586 | Normal | Normal |
| 4499 | Normal | Normal | 4587 | Normal | Normal |
| 4502 | MCI    | MCI    | 4590 | MCI    | Normal |
| 4503 | Normal | Normal | 4594 | MCI    | Normal |
| 4505 | Normal | Normal | 4595 | MCI    | MCI    |
| 4507 | MCI    | Normal | 4596 | MCI    | MCI    |
| 4508 | Normal | Normal | 4597 | MCI    | Normal |
| 4510 | MCI    | Normal | 4598 | Normal | Normal |
| 4513 | MCI    | Normal | 4599 | Normal | Normal |
| 4514 | MCI    | MCI    | 4601 | MCI    | Normal |
| 4515 | MCI    | MCI    | 4603 | MCI    | Normal |
| 4516 | Normal | Normal | 4604 | Normal | Normal |
| 4517 | MCI    | MCI    | 4605 | MCI    | MCI    |
| 4520 | Normal | Normal | 4607 | Normal | Normal |
| 4521 | MCI    | MCI    | 4610 | MCI    | MCI    |
| 4522 | MCI    | Normal | 4611 | MCI    | Normal |
| 4524 | MCI    | MCI    | 4612 | Normal | Normal |
| 4530 | MCI    | MCI    | 4613 | MCI    | Normal |
| 4531 | MCI    | MCI    | 4614 | MCI    | Normal |
| 4536 | MCI    | Normal | 4616 | Normal | Normal |
| 4538 | MCI    | MCI    | 4620 | Normal | Normal |
| 4539 | MCI    | Normal | 4621 | MCI    | Normal |

|      |        |        |      |        |        |
|------|--------|--------|------|--------|--------|
| 4623 | MCI    | MCI    | 4745 | MCI    | Normal |
| 4624 | MCI    | Normal | 4746 | MCI    | Normal |
| 4626 | MCI    | Normal | 4750 | MCI    | Normal |
| 4629 | MCI    | Normal | 4757 | MCI    | MCI    |
| 4630 | MCI    | Normal | 4764 | MCI    | Normal |
| 4631 | MCI    | MCI    | 4765 | MCI    | MCI    |
| 4632 | Normal | Normal | 4767 | MCI    | Normal |
| 4633 | MCI    | MCI    | 4769 | MCI    | Normal |
| 4635 | MCI    | Normal | 4777 | MCI    | Normal |
| 4636 | MCI    | Normal | 4780 | MCI    | Normal |
| 4637 | Normal | Normal | 4784 | MCI    | MCI    |
| 4643 | Normal | Normal | 4791 | MCI    | MCI    |
| 4644 | Normal | Normal | 4793 | MCI    | MCI    |
| 4645 | Normal | Normal | 4796 | MCI    | MCI    |
| 4646 | MCI    | MCI    | 4798 | MCI    | Normal |
| 4649 | Normal | Normal | 4799 | MCI    | Normal |
| 4653 | MCI    | Normal | 4803 | MCI    | Normal |
| 4654 | MCI    | Normal | 4804 | MCI    | Normal |
| 4659 | MCI    | Normal | 4805 | MCI    | MCI    |
| 4661 | MCI    | MCI    | 4806 | MCI    | MCI    |
| 4668 | MCI    | MCI    | 4807 | MCI    | MCI    |
| 4671 | MCI    | Normal | 4809 | MCI    | MCI    |
| 4674 | MCI    | MCI    | 4813 | MCI    | Normal |
| 4675 | MCI    | MCI    | 4814 | MCI    | Normal |
| 4678 | MCI    | Normal | 4815 | MCI    | MCI    |
| 4679 | MCI    | Normal | 4816 | MCI    | Normal |
| 4680 | MCI    | MCI    | 4817 | MCI    | Normal |
| 4689 | MCI    | MCI    | 4823 | MCI    | MCI    |
| 4694 | MCI    | Normal | 4825 | MCI    | Normal |
| 4706 | MCI    | Normal | 4832 | Normal | Normal |
| 4708 | MCI    | MCI    | 4835 | Normal | Normal |
| 4711 | MCI    | MCI    | 4838 | MCI    | Normal |
| 4712 | MCI    | Normal | 4842 | MCI    | Normal |
| 4713 | MCI    | Normal | 4844 | MCI    | MCI    |
| 4714 | MCI    | MCI    | 4849 | MCI    | Normal |
| 4715 | MCI    | MCI    | 4852 | MCI    | MCI    |
| 4720 | MCI    | MCI    | 4857 | MCI    | MCI    |
| 4721 | MCI    | Normal | 4858 | MCI    | Normal |
| 4722 | MCI    | Normal | 4868 | MCI    | MCI    |
| 4723 | MCI    | Normal | 4869 | MCI    | Normal |
| 4729 | MCI    | Normal | 4871 | MCI    | Normal |
| 4736 | MCI    | Normal | 4873 | MCI    | Normal |
| 4741 | MCI    | Normal | 4874 | MCI    | Normal |
| 4742 | MCI    | Normal | 4876 | MCI    | Normal |
| 4743 | MCI    | MCI    | 4877 | MCI    | MCI    |
| 4744 | MCI    | MCI    | 4883 | MCI    | Normal |

|      |     |        |      |     |        |
|------|-----|--------|------|-----|--------|
| 4885 | MCI | MCI    | 4944 | MCI | Normal |
| 4888 | MCI | Normal | 4945 | MCI | MCI    |
| 4889 | MCI | MCI    | 4947 | MCI | MCI    |
| 4891 | MCI | Normal | 4955 | MCI | Normal |
| 4893 | MCI | Normal | 4958 | MCI | Normal |
| 4896 | MCI | MCI    | 4960 | MCI | Normal |
| 4897 | MCI | Normal | 4966 | MCI | Normal |
| 4898 | MCI | Normal | 4974 | MCI | Normal |
| 4899 | MCI | Normal | 4976 | MCI | Normal |
| 4902 | MCI | Normal | 4985 | MCI | MCI    |
| 4904 | MCI | Normal | 4986 | MCI | Normal |
| 4907 | MCI | Normal | 4987 | MCI | MCI    |
| 4909 | MCI | MCI    | 4989 | MCI | Normal |
| 4917 | MCI | MCI    | 5000 | MCI | MCI    |
| 4919 | MCI | Normal | 5004 | MCI | Normal |
| 4920 | MCI | Normal | 5007 | MCI | Normal |
| 4922 | MCI | MCI    | 5014 | MCI | MCI    |
| 4925 | MCI | MCI    | 5026 | MCI | Normal |
| 4926 | MCI | MCI    | 5031 | MCI | MCI    |
| 4928 | MCI | MCI    | 5047 | MCI | Normal |
| 4929 | MCI | MCI    | 5066 | MCI | Normal |
| 4936 | MCI | MCI    | 5099 | MCI | Normal |
| 4941 | MCI | Normal | 5135 | MCI | MCI    |
| 4943 | MCI | MCI    | 5160 | MCI | Normal |
